# Supplementary material for: Analysis of Pre- and Posttreatment Tissues from the SWOG S0800 Trial Reveals an Effect of Neoadjuvant Chemotherapy on the Breast Cancer Genome
Source: Oxford University Press journal article supplement (doi:10.1158/1078-0432.ccr-19-2405), 2020-01-09

**Supplementary Figure 3.** Pre- and Post-treatment biopsy cellularity for each patient in the SWOG S0800 cohort. The dotted line indicates the selected cut off for retaining samples in pre-post analysis.


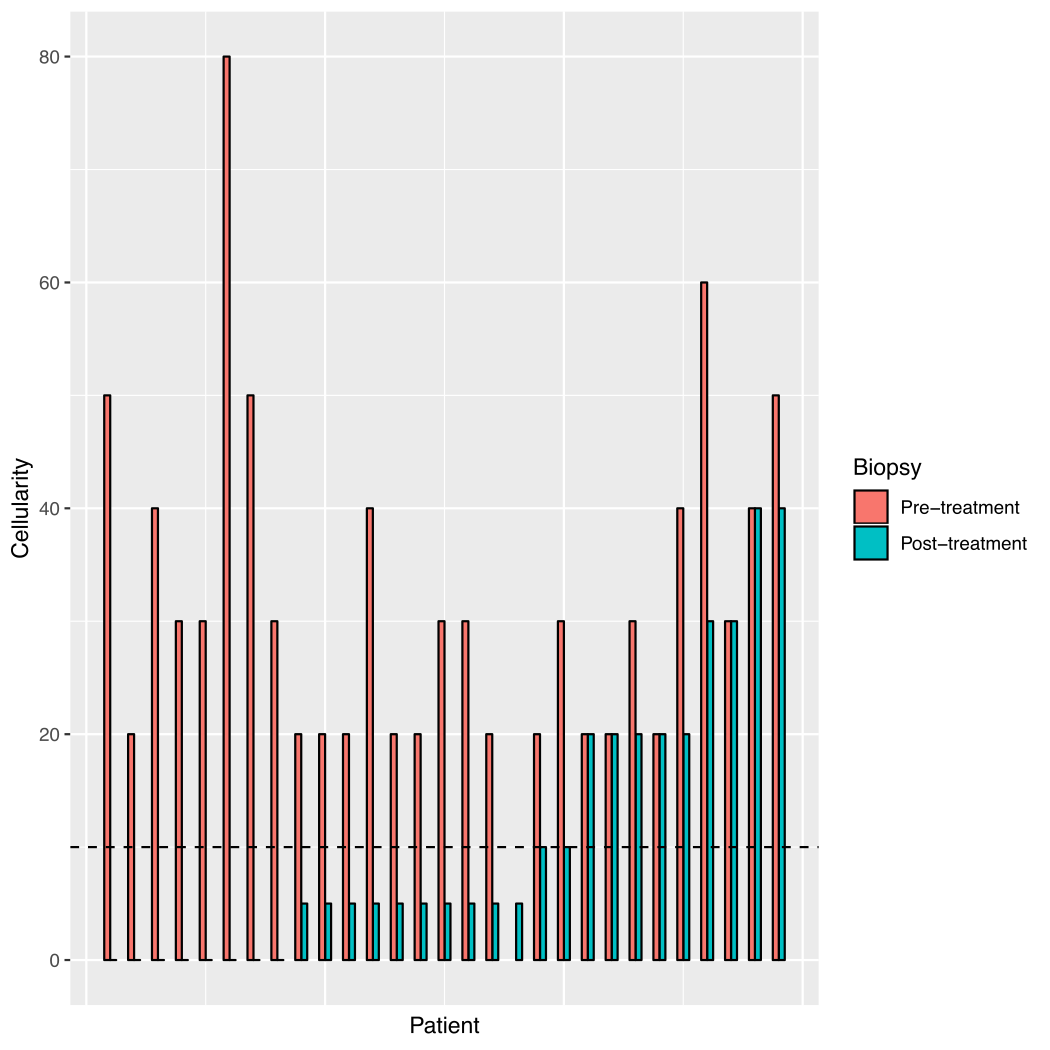

Supplement: 10780432ccr192405-sup-226119_2_supp_5973600_q2qn60.docx [file 10780432ccr192405-sup-226119_2_supp_5973600_q2qn60.docx]
